# Supplementary material
Source: PubMed Central journal article supplement (PMC4510182)
Supplement: AEM.03987-14_zam999116481so1.pdf [file AEM.03987-14_zam999116481so1.pdf]

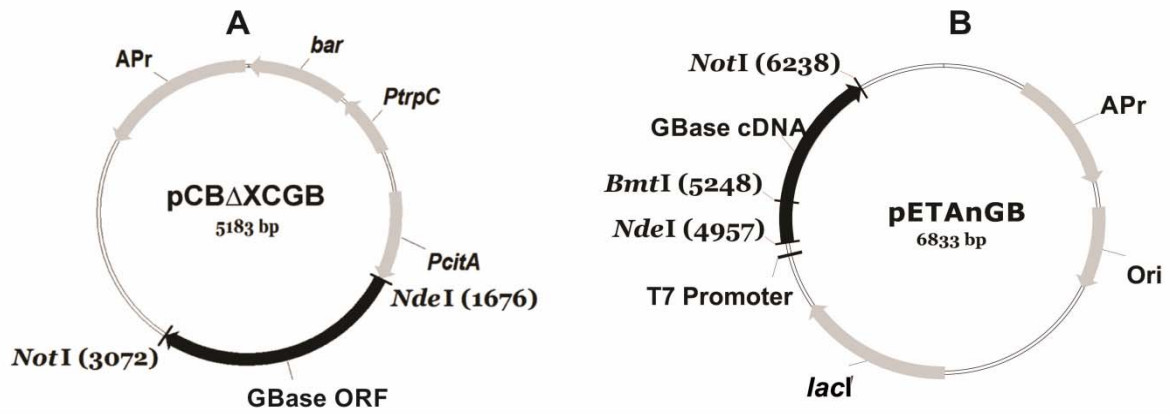

**FIG S1** Plasmids for GBase expression. (A) Expression of GBase ORF in *A. niger* is driven by citric acid synthase (*citA*) promoter. (B) GBase cDNA expression construct in pET43.1b.

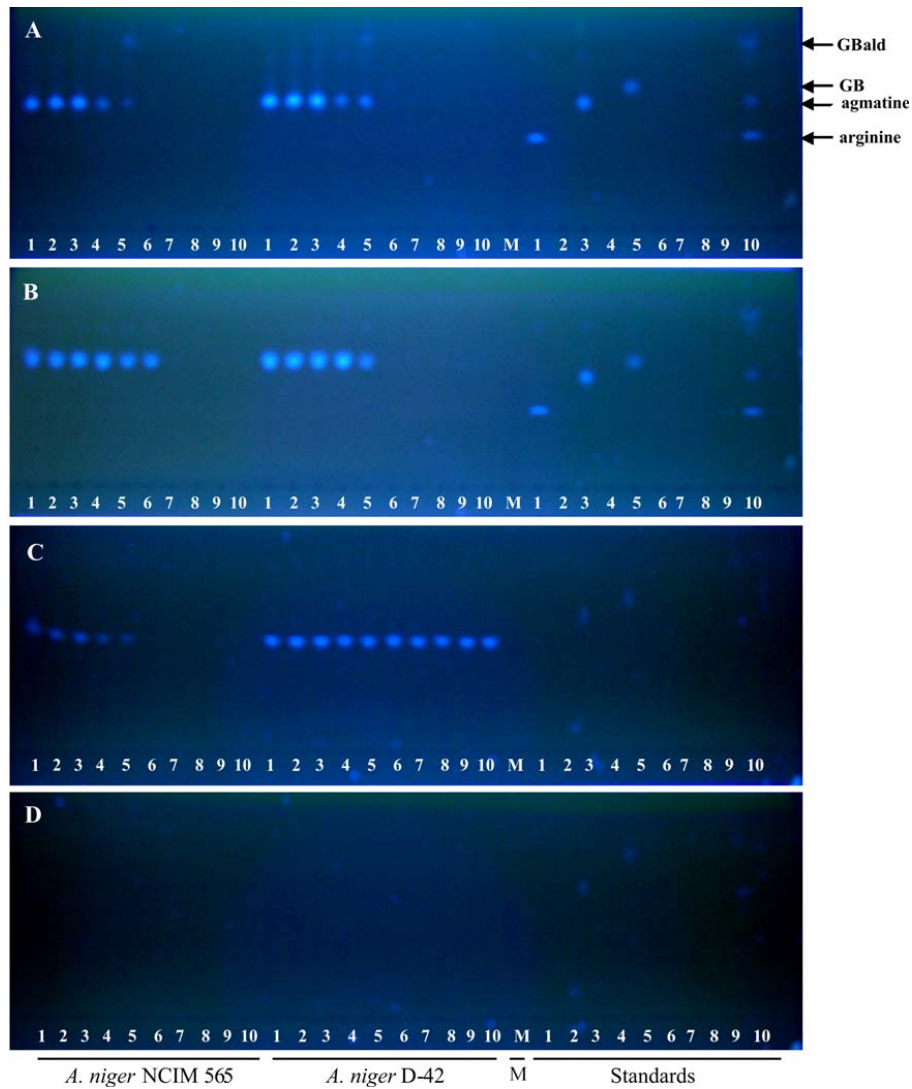

**FIG S2** Detection of guanidinium compounds on TLC after fluorescence derivatization. *A. niger* strains (WT and D-42 strains) were grown in liquid culture with agmatine (panel A), GB (panel B), L-arginine (panel C) and NH<sub>4</sub>NO<sub>3</sub> (panel D) as sole nitrogen source. Aliquots of these culture media (2.0 µl each) were derivatized with benzoin before spotting on the TLC plates, developed in solvent system II and visualized under UV light. Data for samples after every 10 h of growth (Lanes 1-10) are shown. Culture medium with no nitrogen (Lane M), the standards (L-arginine, ornithine, agmatine, putrescine, GB, GABA, urea, citrulline, SSA and GBald; Lanes 1-10) were also included.

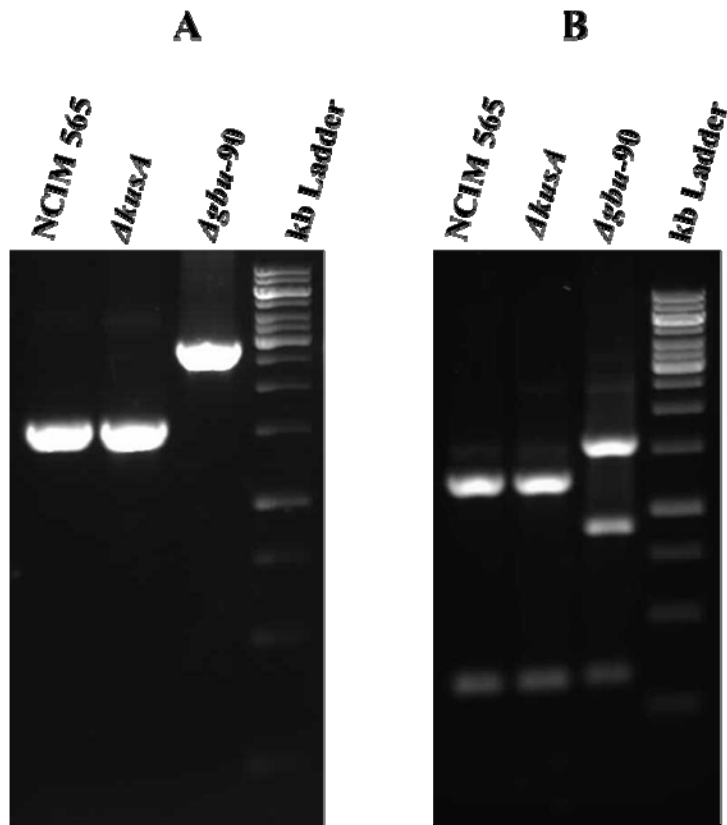

**FIG S3** Genomic PCR and characterization of *A. niger*  $\Delta gbu-90$  strain

(A) Agarose gel showing genomic PCR products of *A. niger* strains NCIM-565 (1.6 kb),  $\Delta kusA$  (1.6 kb) and  $\Delta gbu-90$  (2.8 kb).

(B) *EcoRV* digestion patterns of the respective PCR products: NCIM 565 and  $\Delta kusA$  (two fragments of 1.3 kb and 0.3 kb),  $\Delta gbu-90$  (three fragments of 1.6 kb, 0.9 kb and 0.3 kb).

**Table S1**Enzyme activities in *Aspergillus nidulans* mycelia

| <b>Ureohydrolase</b>            |                                                    |          |            |
|---------------------------------|----------------------------------------------------|----------|------------|
| Nitrogen source                 | Activity (U mg <sup>-1</sup> protein) <sup>a</sup> |          |            |
|                                 | 4-Guanidinobutyrase                                | Arginase | Agmatinase |
| L-Arginine                      | ND                                                 | 11.28    | ND         |
| Agmatine                        | 0.33                                               | 0.28     | ND         |
| GB                              | 0.15                                               | 0.43     | ND         |
| NH <sub>4</sub> NO <sub>3</sub> | ND                                                 | 0.40     | ND         |

<sup>a</sup> Activity data in crude extract is representative of two independent experiments (in duplicates) and the variation was less than 10%; 'ND' denotes not detected.
